# Supplementary material for: Task Shifting and Sustainability: Nonphysician anesthetist satisfaction and role in the field - a mixed method cross sectional analysis in primary and secondary hospitals of Nepal
Source: Research Square preprint supplement (doi:10.21203/rs.3.rs-7805783/v1), 2025-12-01
Supplement: Supplementary file 1 [file 59ab2d8829d944b22ac52b78.docx]

## Supplemental Materials

Supplemental Table S1: Distribution of participants based on facets of job satisfaction

| **Facets of Job Satisfaction** | **Disagree very much**  **n (%)** | **Disagree moderately**  **n (%)** | **Disagree slightly**  **n (%)** | **Agree slightly**  **n (%)** | **Agree moderately**  **n (%)** | **Agree very much**  **n (%)** |
| --- | --- | --- | --- | --- | --- | --- |
| **Payment** | | | | | | |
| 1 I feel I am being paid a fair amount for the work I do. | 31 (34.1) | 11 (12.1) | 6 (6.6) | 16 (17.6) | 22 (24.2) | 5 (5.5) |
| 10 Raises are too few and far between | 10 (11) | 7 (7.7) | 6 (6.6) | 16 (17.6) | 26 (28.6) | 26 (28.6) |
| 19 I feel unappreciated by the organization when I think about what they pay me | 15 (16.5) | 13 (14.3) | 14 (15.4) | 12 (13.2) | 18 (19.8) | 19 (20.9) |
| 28 I feel satisfied with my chances for salary increases | 27 (29.7) | 9 (9.9) | 4 (4.4) | 20 (22) | 19 (20.9) | 12 (13.2) |
| **Promotions** | | | | | | |
| 2 There is too little chance for promotion at my job. | 18 (19.8) | 6 (6.6) | 7 (7.7) | 12 (13.2) | 9 (9.9) | 39 (42.9) |
| 11 Those who do well on the job stand a fair chance of being promoted | 37 (40.7) | 15 (16.5) | 13 (14.3) | 7 (7.7) | 13 (14.3) | 6 (6.6) |
| 20 People get ahead as fast here as they do in other places | 27 (29.7) | 16 (17.6) | 11 (12.1) | 14 (15.4) | 11 (12.1) | 12 (13.2) |
| 33 I am satisfied with my chances for promotion | 5 (5.5) | 6 (6.6) | 9 (9.9) | 23 (25.3) | 16 (17.6) | 32 (35.2) |
| **Supervision** | | | | | | |
| 3 My supervisor is quite competent in doing his/her job | 3 (3.3) | 11 (12.1) | 10 (11) | 17 (18.7) | 24 (26.4) | 26 (28.6) |
| 12 My supervisor is unfair to me. | 39 (42.9) | 16 (17.6) | 7 (7.7) | 10 (11) | 8 (8.8) | 11 (12.1) |
| 21 My supervisor shows too little interest in the feelings of subordinates | 17 (18.7) | 11 (12.1) | 11 (12.1) | 13 (14.3) | 22 (24.2) | 17 (18.7) |
| 30 I like my supervisor | 11 (12.1) | 1 (1.1) | 1 (1.1) | 24 (26.4) | 25 (27.5) | 29 (31.9) |
| **Fringe Benefits** | | | | | | |
| 4 I am not satisfied with the benefits I receive | 9 (9.9) | 12 (13.2) | 7 (7.7) | 20 (22) | 15 (16.5) | 28 (30.8) |
| 13 The benefits we receive are as good as most other organizations offer | 31 (34.1) | 15 (16.5) | 7 (7.7) | 12 (13.2) | 13 (14.3) | 13 (14.3) |
| 22 The benefit package we have is equitable | 23 (25.3) | 23 (25.3) | 11 (12.1) | 13 (14.3) | 10 (11) | 11 (12.1) |
| 29 There are benefits we do not have which we should have | 6 (6.6) | 4 (4.4) | 9 (9.9) | 15 (16.5) | 24 (26.4) | 33 (36.3) |
| **Contingent rewards** | | | | | | |
| 5 When I do a good job, I receive the recognition for it that I should receive | 16 (17.6) | 4 (4.4) | 7 (7.7) | 21 (23.1) | 23 (25.3) | 20 (22) |
| 14 I do not feel that the work I do is appreciated | 12 (13.2) | 16 (17.6) | 10 (11) | 16 (17.6) | 19 (20.9) | 18 (19.8) |
| 23 There are few rewards for those who work here | 19 (20.9) | 6 (6.6) | 7 (7.7) | 14 (15.4) | 15 (16.5) | 30 (33) |
| **Operating conditions** | | | | | | |
| 6 Many of our rules and procedures make doing a good job difficult | 15 (16.5) | 10 (11) | 6 (6.6) | 27 (29.7) | 12 (13.2) | 21 (23.1) |
| 15 My efforts to do a good job are seldom blocked by red tape | 18 (19.8) | 18 (19.8) | 9 (9.9) | 25 (27.5) | 9 (9.9) | 12 (13.2) |
| 24 I have too much to do at work | 5 (5.5) | 6 (6.6) | 10 (11) | 19 (20.9) | 16 (17.6) | 35 (38.5) |
| 31 I have too much paperwork | 8 (8.8) | 14 (15.4) | 15 (16.5) | 27 (29.7) | 14 (15.4) | 13 (14.3) |
| **Cow-workers** | | | | | | |
| 7 I like the people I work with | 4 (4.4) | 3 (3.3) | 2 (2.2) | 14 (15.4) | 22 (24.2) | 46 (50.5) |
| 16 I find I have to work harder at my job because of the incompetence of people I work with | 23 (25.3) | 11 (12.1) | 15 (16.5) | 13 (14.3) | 15 (16.5) | 14 (15.4) |
| 25 I enjoy my coworkers | 3 (3.3) | 5 (5.5) | 1 (1.1) | 19 (20.9) | 30 (33) | 33 (36.3) |
| 34 There is too much bickering and fighting at work. | 30 (33) | 14 (15.4) | 13 (14.3) | 16 (17.6) | 10 (11) | 8 (8.8) |
| **Nature of work** | | | | | | |
| 8 I sometimes feel my job is meaningless | 45 (49.5) | 9 (9.9) | 6 (6.6) | 9 (9.9) | 7 (7.7) | 15 (16.5) |
| 17 I like doing the things I do at work | 6 (6.6) | 3 (3.3) | 0 | 11 (12.1) | 17 (18.7) | 54 (59.3) |
| 27 I feel a sense of pride in doing my job | 5 (5.5) | 1 (1.1) | 1 (1.1) | 9 (9.9) | 8 (8.8) | 67 (73.6) |
| 35 My job is enjoyable | 5 (5.5) | 1 (1.1) | 3 (3.3) | 18 (19.8) | 18 (19.8) | 46 (50.5) |
| **Communication** | | | | | | |
| 9 Communications seem good within this organization | 10 (11) | 7 (7.7) | 5 (5.5) | 21 (23.1) | 25 (27.5) | 23 (25.3) |
| 18 The goals of this organization are not clear to me | 25 (27.5) | 15 (16.5) | 16 (17.6) | 16 (17.6) | 7 (7.7) | 12 (13.2) |
| 26 I often feel that I do not know what is going on with the organization | 8 (8.8) | 15 (16.5) | 8 (8.8) | 23 (25.3) | 20 (22) | 17 (18.7) |
| 36 Work assignments are not fully explained | 12 (13.2) | 8 (8.8) | 7 (7.7) | 21 (23.1) | 12 (13.3) | 31 (34.1) |

**Table S1s:** Distribution of participants based on facets of job satisfaction

Supplemental Table S2: Bivariate analysis of Job satisfaction with independent variables

| **Variable** | **n** | **Satisfied** | **Dissatisfied** | **df** | **P-value** |
| --- | --- | --- | --- | --- | --- |
| **Experience as AA** | | | | | |
| <1 year | 17 | 8 | 11 | 3 | 0.818 |
| 1 - 3 years | 18 | 8 | 10 |
| 3 - 5 years | 16 | 9 | 7 |
| >5 years | 35 | 18 | 17 |
| **Contract Type** | | | | | |
| Contract | 46 | 32 | 14 | 1 | < 0.001*** |
| Permanent | 42 | 11 | 31 |
| **Education** | | | | | |
| Other | 13 | 5 | 8 | 2 | 0.632 |
| HA | 69 | 37 | 32 |
| Staff Nurse | 6 | 3 | 3 |
| **Availability of other Surgical Staff** | | | | | |
| Anesthesiologist | 7 | 3 | 4 | 3 | 0.502 |
| Consultants | 73 | 38 | 35 |
| ASBA | 3 | 1 | 2 |
| No surgeon | 5 | 1 | 4 |
| **Hospital Level **** | | | | | |
| Primary | 46 | 22 | 24 | 2 | 0.9795 |
| Secondary | 40 | 20 | 20 |
| Tertiary | 2 | 1 | 1 |
| **CSSP Supported Hospitals** | | | | | |
| Yes | 41 | 25 | 16 | 1 | 0.056 |
| Phased Out or No | 47 | 18 | 29 |
| **NSI Supported Staff** | | | | | |
| Yes | 29 | 21 | 8 | 1 | 0.004 ** |
| No | 59 | 22 | 37 |
| **Hospital MSS Score Category** | | | | | |
|  | 88 | 79% ± 15% | 75% ± 15% | 84.43 | 0.536 |
| **Number of Surgeries** | | | | | |
| ≤10 major surgeries | 12 | 2 | 10 | 1 | 0.029 * |
| >10 major surgeries | 72 | 40 | 32 |
| **Geography** | | | | | |
| Himal | 14 | 8 | 6 | 1 | 0.543 |
| Hills | 32 | 17 | 15 |
| Terai | 42 | 18 | 24 |
| **Hospital Governance** | | | | | |
| Local | 21 | 9 | 12 | 1 | 0.703 |
| Provincial | 67 | 34 | 33 |

**Table S2.** Bivariate analysis of Job satisfaction with independent variables. Chi-squared test used for categorical variables when all cells were greater than 5. When cells were 5 or less, fisher's exact test was used. T-test used for continuous variables.
