# Supplementary material for: Task Shifting and Sustainability: Nonphysician anesthetist satisfaction and role in the field - a mixed method cross sectional analysis in primary and secondary hospitals of Nepal
Source: Research Square preprint supplement (doi:10.21203/rs.3.rs-7805783/v1), 2025-12-01
Supplement: Supplementary file 2 [file c92c703b8618a9e5b4150a7c.docx]

**English Version**

**Anesthesia Assistant (AA) - Individual Interview**

**We would like to begin by asking about your personal experiences**:

- How did you start working in this field?
- What brought you into this profession?
- What kind of motivation or pressure influenced your decision?

**We would now like to ask about your AA / AAC / AT course experience:**

- Where and how did you complete your AA / AAC / AT training?
- Which subjects or skills were most useful or challenging during your training?

**We will now talk about your current work setting and the support you receive:**

- How long have you been working here?
- How did you get this opportunity to work here?
- Who do you work with most frequently in OT ? (AA, OT nurse, surgeon, etc.)
- Was this your first workplace after graduation or were you posted elsewhere before?
- Have you applied the knowledge and skills gained in training in this hospital?
- Have you worked under the supervision of an MDGP / Anesthesiologist? Has that helped your skills grow?

**Let’s now talk about the practical aspects of your work:**

- What are your main responsibilities and duties?
- What tasks do you regularly perform?
- Which procedures are you allowed to perform independently and which require supervision?
- How would you describe your workload?

**Regarding the contribution of your work:**

- What do you feel are the major outcomes or results of your work?
- How do you think your role contributes to the overall functioning of this hospital?
- Do you think AA has been useful for improving surgery services in this hospital? (Consider the OT team, equipment, support system, etc.)
- In your opinion, what is the significance of having an AA in the surgical team? (Probe: Patient care, patient outcome, remuneration)

**We would now like to hear your reflections regarding your personal aspirations and the environment of this facility:**

- What are some of the future aspirations or goals you hope to achieve while working at this facility?
- What types of tasks or activities do you hope to engage in moving forward?
- How would you describe the overall working environment at this facility? Are there any enabling or challenging factors?
- Are there sufficient opportunities here for you to continue working long-term (i.e., for the next 2–3 years)? If not, what are the reasons that might make you consider leaving?
- Are there specific conditions or support systems you would require to continue working here? What are those needs?

**Let’s now focus on the availability and quality of OT services as it relates to anesthesia care:**

- Are OT services functional and regularly available in this facility to support anesthesia services effectively?

**Let’s now talk about what you need for your professional growth and satisfaction:**

- What kinds of training opportunities would you need to improve your performance and satisfaction?
- What kind of working environment or support would be helpful for you to continue working effectively in the long run?
- Do you see any potential for career growth while working in this facility?

In this discussion, you have openly and generously shared your experiences and reflections. We are very grateful for that. This discussion will be kept completely confidential. If there is anything else you would like to add or share, you are welcome to do so

**Focus Group Discussion (FGD) with Health Workers Who Work with AA**

**Facility Name: ___________**

**We would like to ask you about your general impressions and experiences working in this facility:**

- In which departments are you working?
- How long have you been working in this facility?

**Let’s talk about surgical services:**

- What is the status of surgery services in your hospital?
- How functional is the surgery team?
- What types of surgeries are commonly done here?
- What kinds of cases still require referral and why?

**Now let's talk about the contribution of the AA:**

- What roles does the AA fulfill? What skills have they demonstrated?
- What are the major areas where they have contributed to surgical care? (Probe: Patient care, outcomes)
- How has the AA worked within the OT team?

**Let’s discuss any challenges and support:**

- What are some enabling or obstructing factors in the work environment for AAs? (e.g., OT equipment, medications, teamwork, etc.)
- What support is necessary to retain skilled HR like AAs in facilities like this?
- What policies are needed to scale or support the integration of AAs into anesthesia care nationally?

In this discussion, you have openly and generously shared your experiences and reflections. We are very grateful for that. This discussion will be kept completely confidential. If there is anything else you would like to add or share, you are welcome to do so

**Interview with Medical Superintendent**

We would like to hear your thoughts on the status of surgical services and the deployment of Anesthesia Assistants (AAs) in this facility.
**We are particularly interested in understanding the current situation of surgical services — including OT setup, surgical case load, HR availability, and anesthesia service delivery.**

- In many hospitals across the province, there is a shortage of certified anesthesia personnel. Is there a sanctioned post of AA in this hospital.
- What kinds of problems faced, or preparations or arrangements were necessary before deploying AAs?
- While recruiting , What kinds of challenges did you initially faced?
- Are AAs working other than sanctioned post as well? (Probe: Number and Source )
- During the deployment of Anesthesia Assistants, what kind of challenges were faced?

**We’d also like to know your reflections on the effectiveness, scope of practice, and relevance of AAs in your facility:**

- What specific roles are AAs performing during anesthesia delivery?
- Are their contributions observable and valuable?
- From your perspective, how significant is their contribution to your facility?
- In addition to their work, what further contributions do they make to the facility? (Probe: workload management, teamwork, etc.)
- Are there any challenges observed regarding infrastructure, equipment, medicine, or coordination while working with AAs?

**On strengthening human resource retention in the OT team:**

- What measures should be taken to retain skilled human resources in the OT team?
- In your opinion, how effective has the integration of AAs been in helping junior doctors or general practitioners deliver safe and quality anesthesia care?
  (Probe: At the local level, provincial level, or in specific contexts — what could be done?)

**Looking ahead:**

- What kinds of interventions or support would be necessary to scale up emergency surgical services in remote regions like this one?
  (Probe: at local, provincial, or national level — what should be done?)

In this discussion, you have openly and generously shared your experiences and reflections. We are very grateful for that. This discussion will be kept completely confidential. If there is anything else you would like to add or share, you are welcome to do so

**Interview with Anesthesiologists Working with AA**

**Facility Name: ___________**

**We would like to ask you about your experiences and observations regarding AAs:**

- How long has the AA been working in this facility?
- What kind of tasks are they performing now?
- Which activities can they do independently?

Let’s talk about surgical services:

- What is the general condition of surgery services here?
- How complete or functional is the surgery team?
- What surgeries are performed here, and which are referred elsewhere?
- What are the main reasons for referral?

Now let’s talk about the role of AA:

- Do you think the AA has adequate skills and training?
- What kind of responsibilities do they handle?
- How well have they been integrated into the OT services?

Let’s explore the impact:

- Do they require frequent supervision?
- Has their presence helped to improve patient care or service delivery?
- Are there any issues or gaps that still need to be addressed?

In this discussion, you have openly and generously shared your experiences and reflections. We are very grateful for that. This discussion will be kept completely confidential. If there is anything else you would like to add or share, you are welcome to do so

**Interview with Directors**

**Facility Name: ___________**

**Status of Surgical Services and Role of Anesthesia Assistants (AAs):**

- In your view, what is the current situation of surgical services in the hospitals located in remote or underserved areas of the country or province?
- What is the status of skilled human resources in the OT teams of hospitals operating in remote or rural areas?
- What is the status of anesthesia service in such hospitals?
- What types of additional support or measures were provided to Deploy Anesthesia Assistants (AAs)? *(Prompt: Sactioned post, program based deployment)*
- For the deployment of trained AAs, what types of challenges did you observe? How were they addressed or managed?
- How were challenges faced by AAs during their deployment addressed by your department?

**Suggestions for Making Emergency Surgical Services Functional in Remote Areas and Reflections on the Role of AAs:**

- In your opinion, what measures should be taken to strengthen and operationalize emergency surgical services in hospitals located in remote and underserved areas of the country or province?
  *(Probe: Support needed at the local level, provincial level, and from federal authorities)*
- What should be done to ensure the retention of skilled human resources (HR) in the OT teams of such hospitals?

Looking ahead:

- What are the gaps and challenges in promoting emergency and elective surgeries in rural areas?
- What policies are needed to retain skilled HR like AAs in such locations?
- What support should the government provide to strengthen the contributions of AAs?

**Future Direction of AA**

- In your opinion, what should be done to deploy AAs effectively in emergency surgical services?
  *(Probe: Within federal deployment mechanisms and in specific programmatic contexts)*
- What activities should be conducted to enhance the competence of AAs?
  *(Probe: Skill upgradation, mentorship, and contextual adaptation)*
- What should be done to further promote and strengthen the presence of AAs in health system? (Probe: Increase production, Posts etc)

In this discussion, you have openly and generously shared your experiences and reflections. We are very grateful for that. This discussion will be kept completely confidential. If there is anything else you would like to add or share, you are welcome to do so
